# Supplementary material
Source: ML conference proceedings conference paper supplement (https://openaccess.thecvf.com/content/CVPR_2020/html/Lokhande_Generating_Accurate_Pseudo-Labels_CVPR_2020_paper.html)
Supplement: Supplementary file 3 [file Lokhande_Generating_Accurate_Pseudo-Labels_CVPR_2020_supplemental.zip]

# HERMITE POLYNOMIALS FOR EFFICIENT GENERATION OF PSEUDOLABELS IN SSL

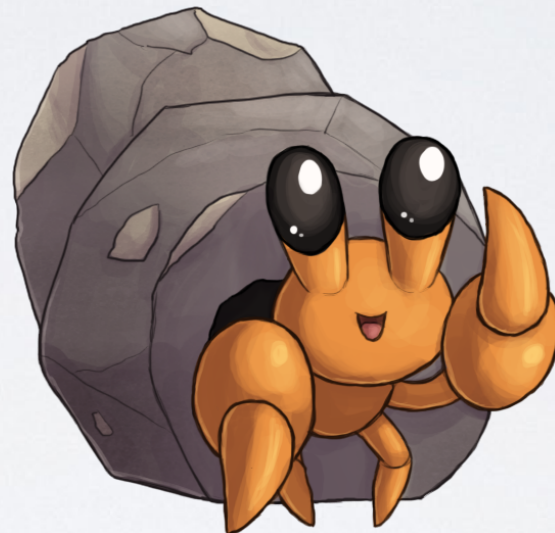

# NON-SMOOTH RELUS TO POLYNOMIAL ACTIVATIONS

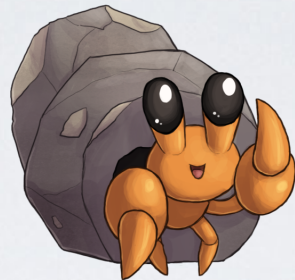

- Ge et al showed that we can avoid spurious local minima using Hermites
- Idea: use the lower order terms in the Hermite polynomial series **Expansion of ReLU** as **Activation Functions**

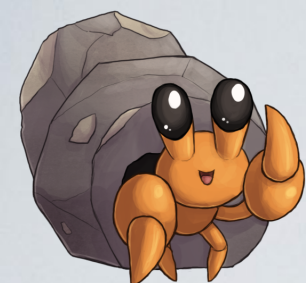

# HERMITE POLYNOMIALS AS ACTIVATIONS

$h_0$

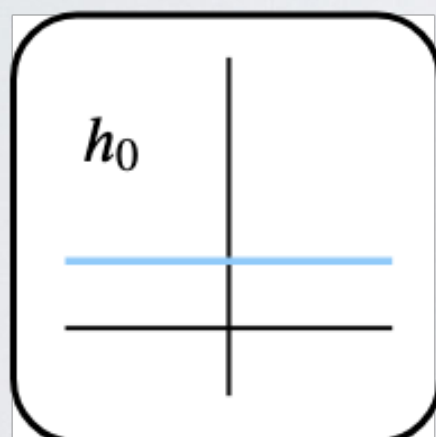

1

$h_1$

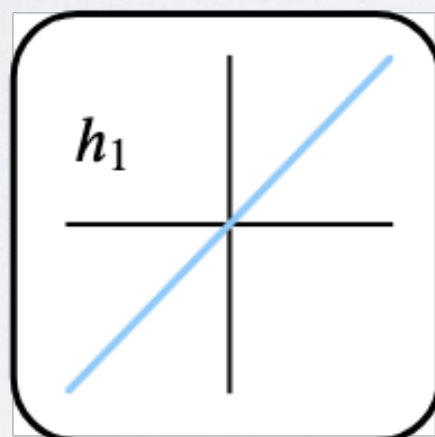

$x$

$h_2$

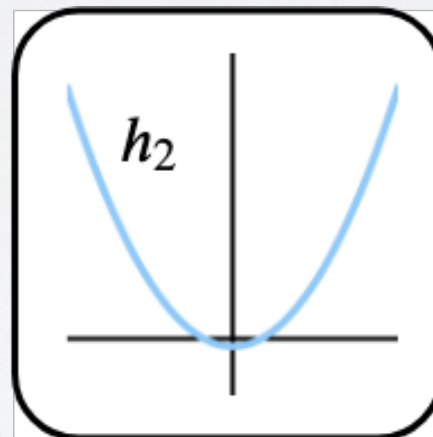

$\frac{x^2 - 1}{2!}$

$h_3$

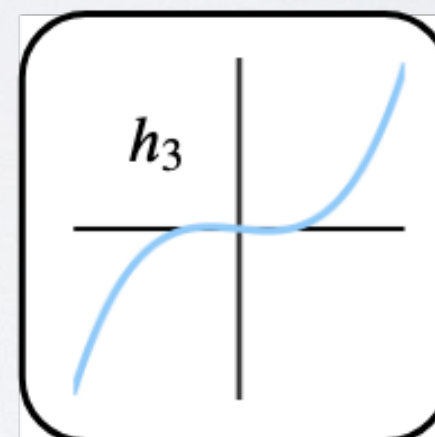

$\frac{x^3 - 3x}{3!}$

$h_4$

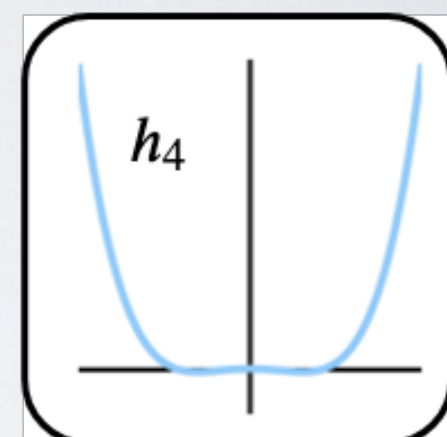

$\frac{x^4 - 6x^2 + 3}{4!}$



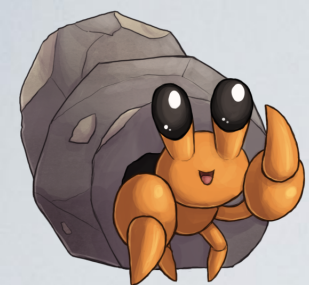

# HERMITES POSSESS EARLY RISER PROPERTY

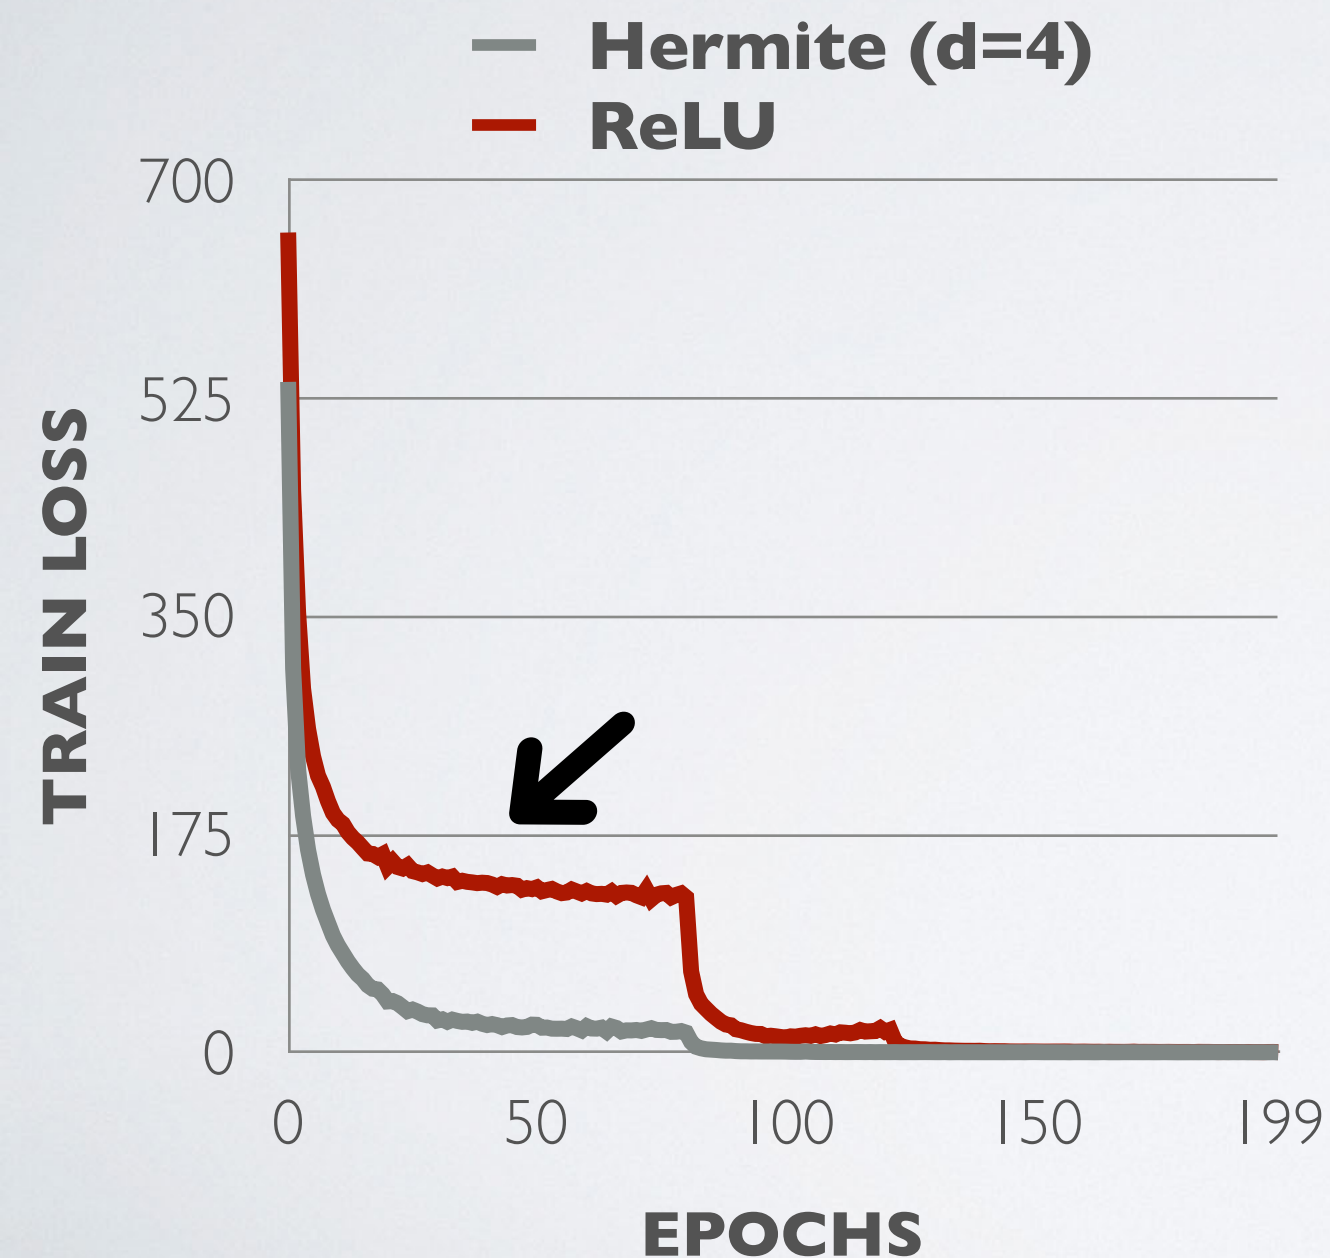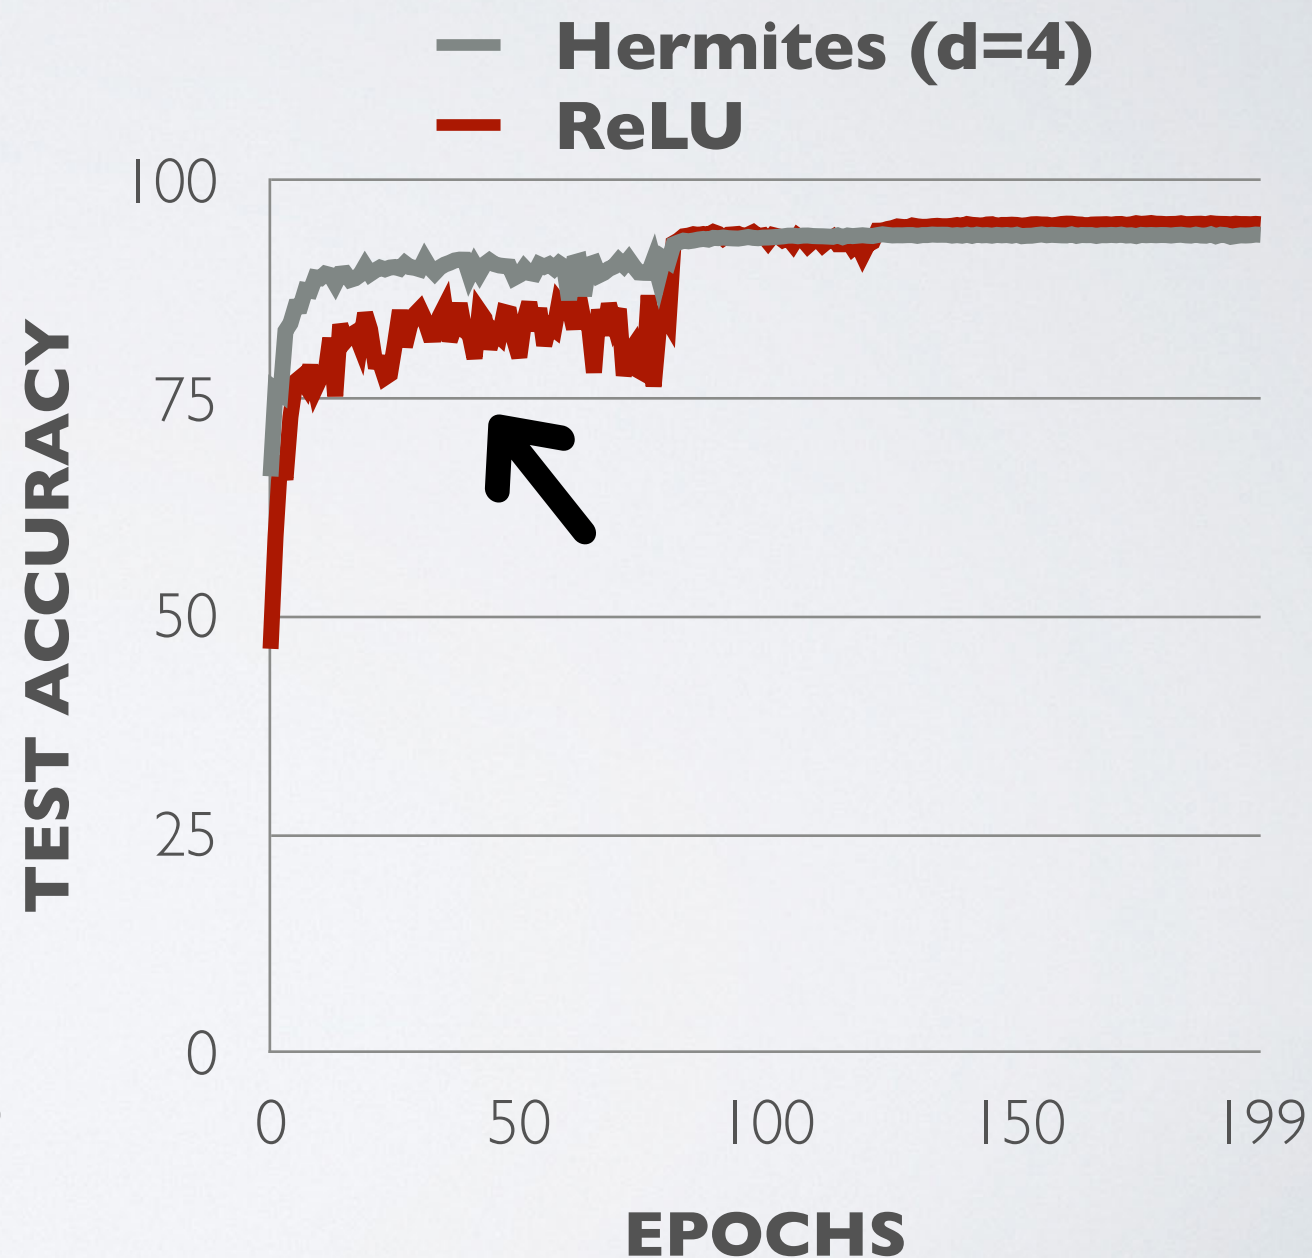

# HERMITES MAKE CONSCIOUS CLASSIFICATIONS

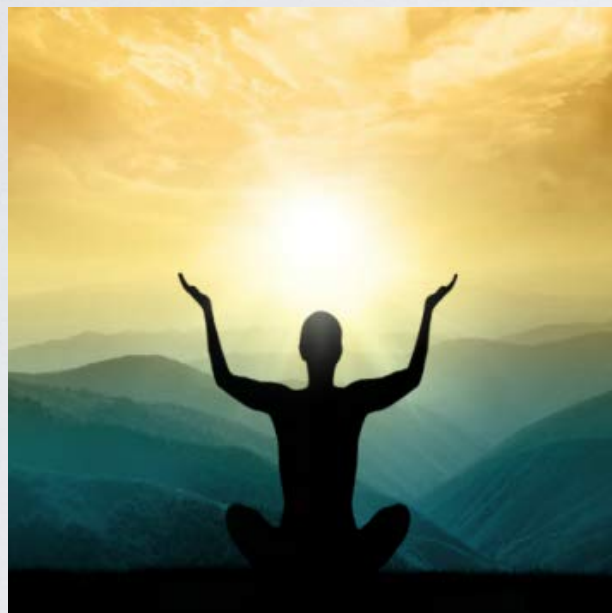

|                | Train<br><b>Similar</b><br>to Test | Train<br><b>Different</b><br>From Test |  |
|----------------|------------------------------------|----------------------------------------|--|
|                |                                    |                                        |  |
| <b>ReLU</b>    | High<br>Confidence<br>Predictions  | High<br>Confidence<br>Predictions      |  |
| <b>Hermite</b> | High<br>Confidence<br>Predictions  | Low<br>Confidence<br>Predictions       |  |

When the test data is different from the training data,  
Hermite networks consciously make (**approximately**)  
**random** predictions unlike ReLU networks



# THE SAAS CONCEPT

## PSEUDO-LABELS GENERATION VIA THE **BANDERSNATCH** PHENOMENON

Good Labels → Least Training Time

CIFAR10

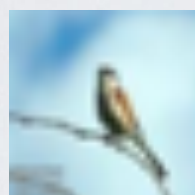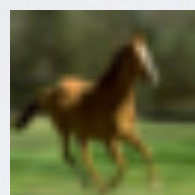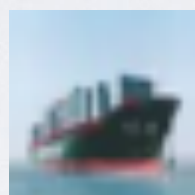

**TRUE  
LABELS**

Bird Horse Ship

**RANDOM  
LABELS**

Cat Truck Dog

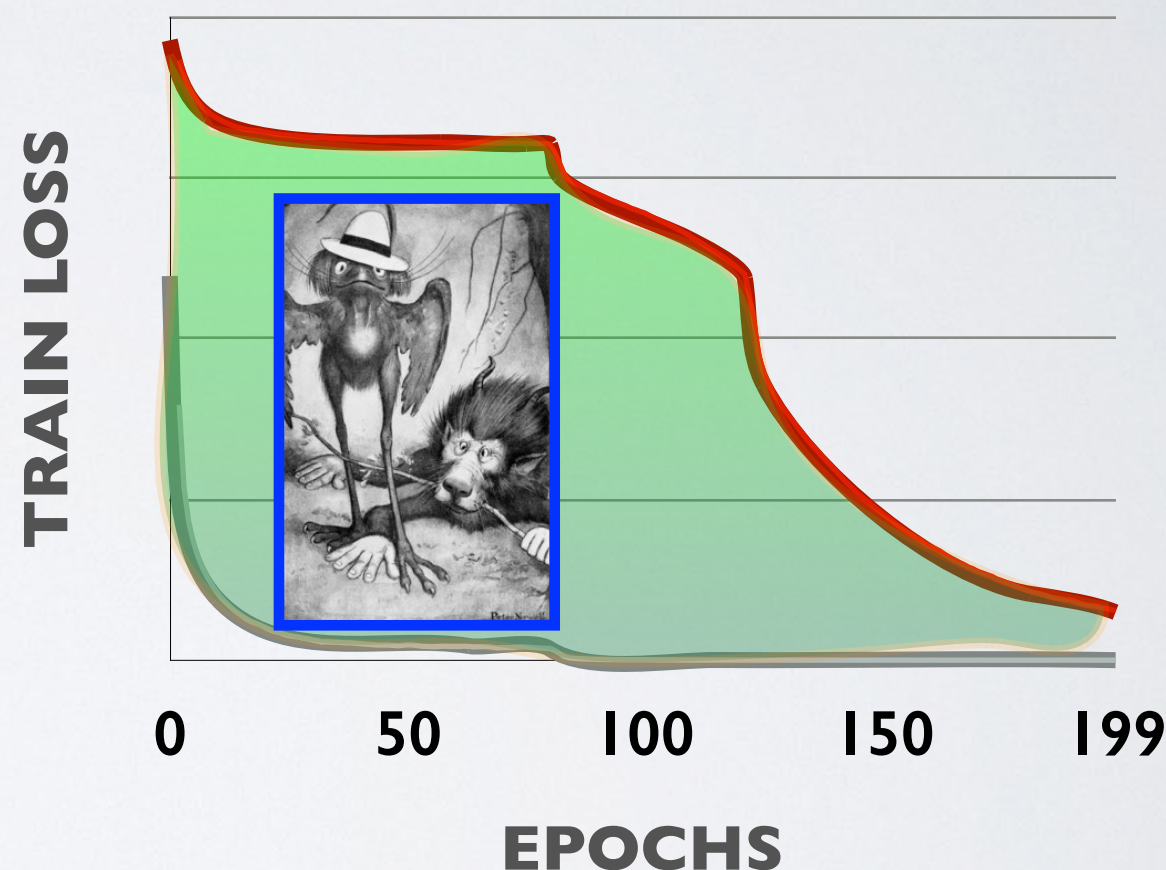

**SaaS: Find labels with least training time**

# COMPUTATIONAL BENEFITS

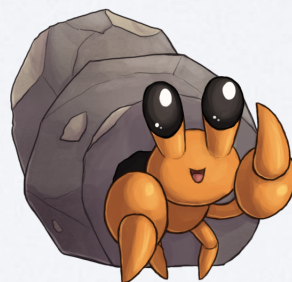

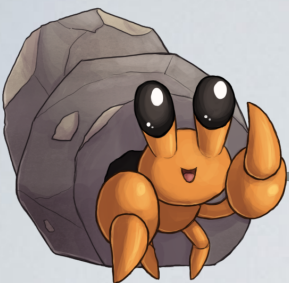

On AWS  
p3.16xlarge

# HERMITE-SAAS **TRAINS FASTER** THAN RELU-SAAS

CIFAR10

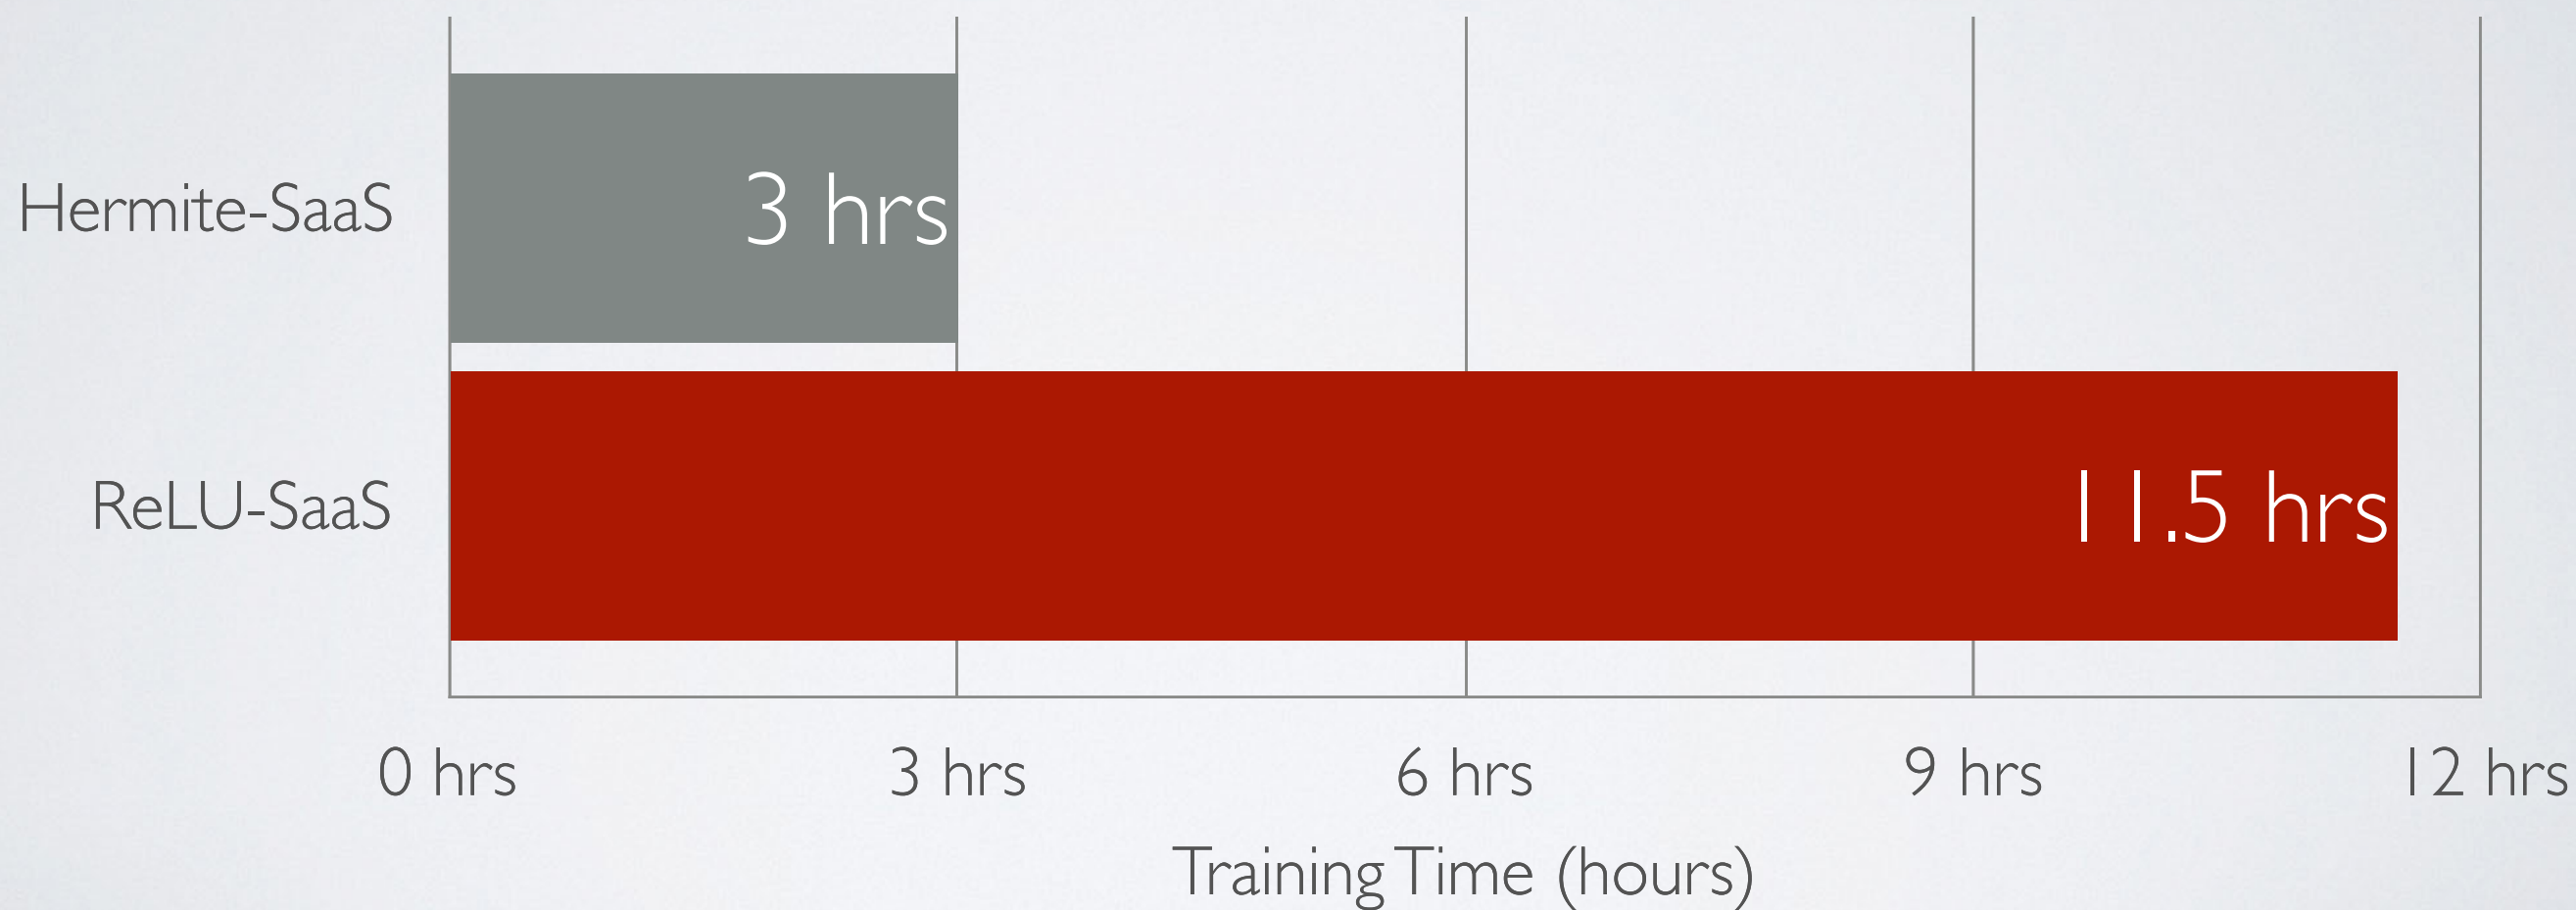



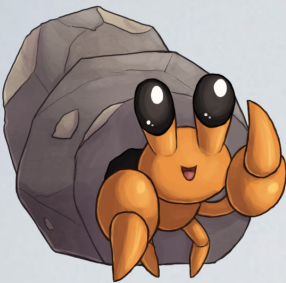

On AWS  
p3.1 6xlarge

# HERMITE-SAAS **COSTS LESS** THAN RELU-SAAS

CIFAR10

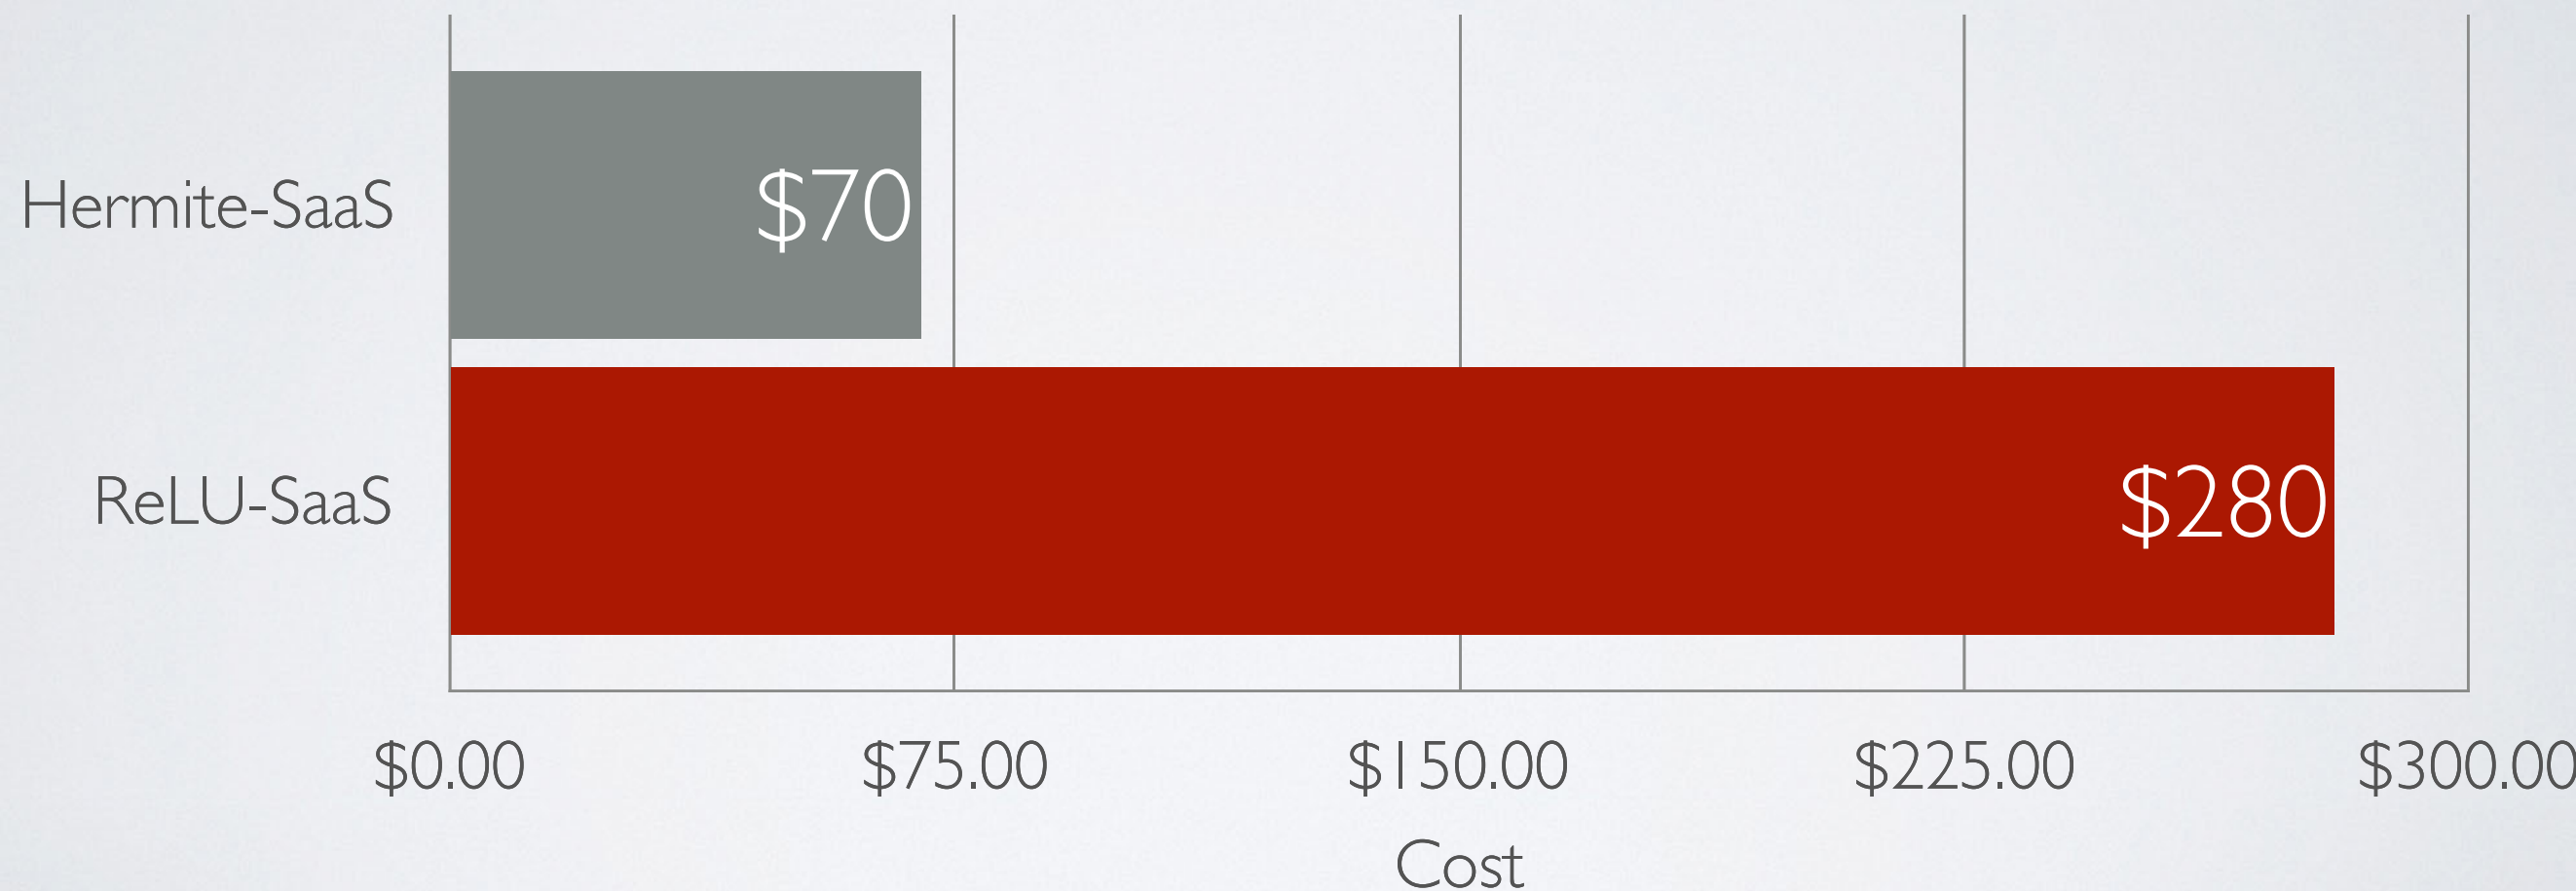

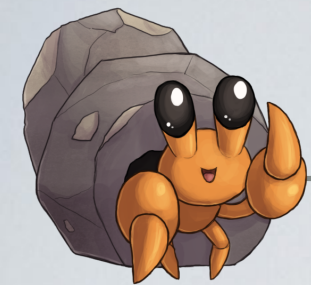

Adding 30% uniform  
noise to labelled data

## HERMITE-SAAS **MORE RESILIENT TO NOISE** THAN RELU-SAAS

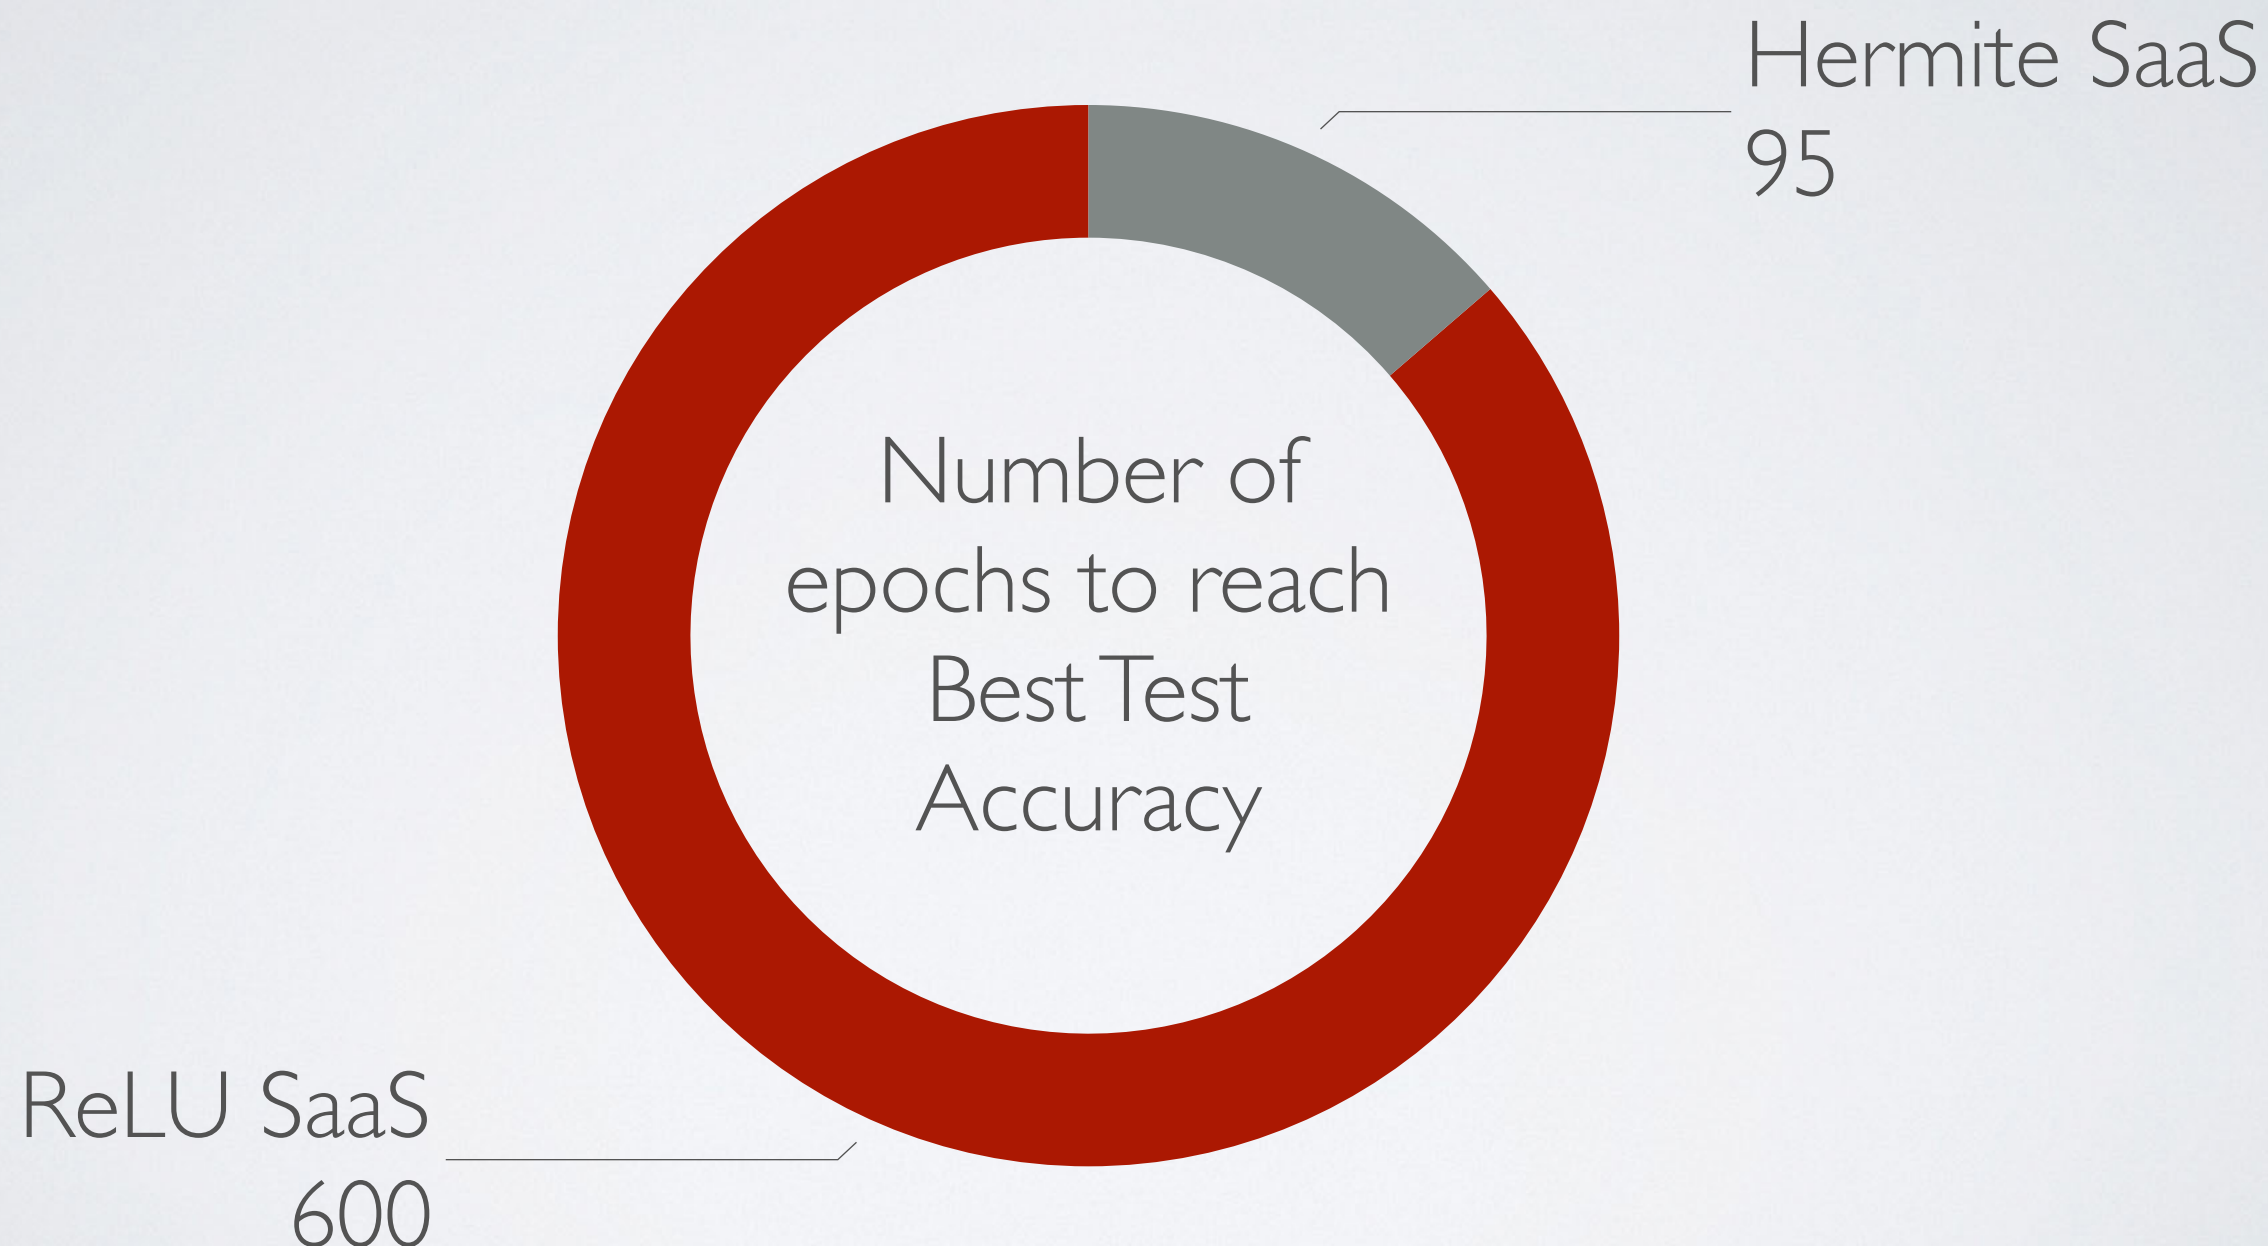

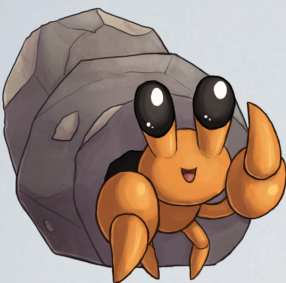

# HERMITE-SAAS **GENERALIZES BETTER** THAN RELU-SAAS

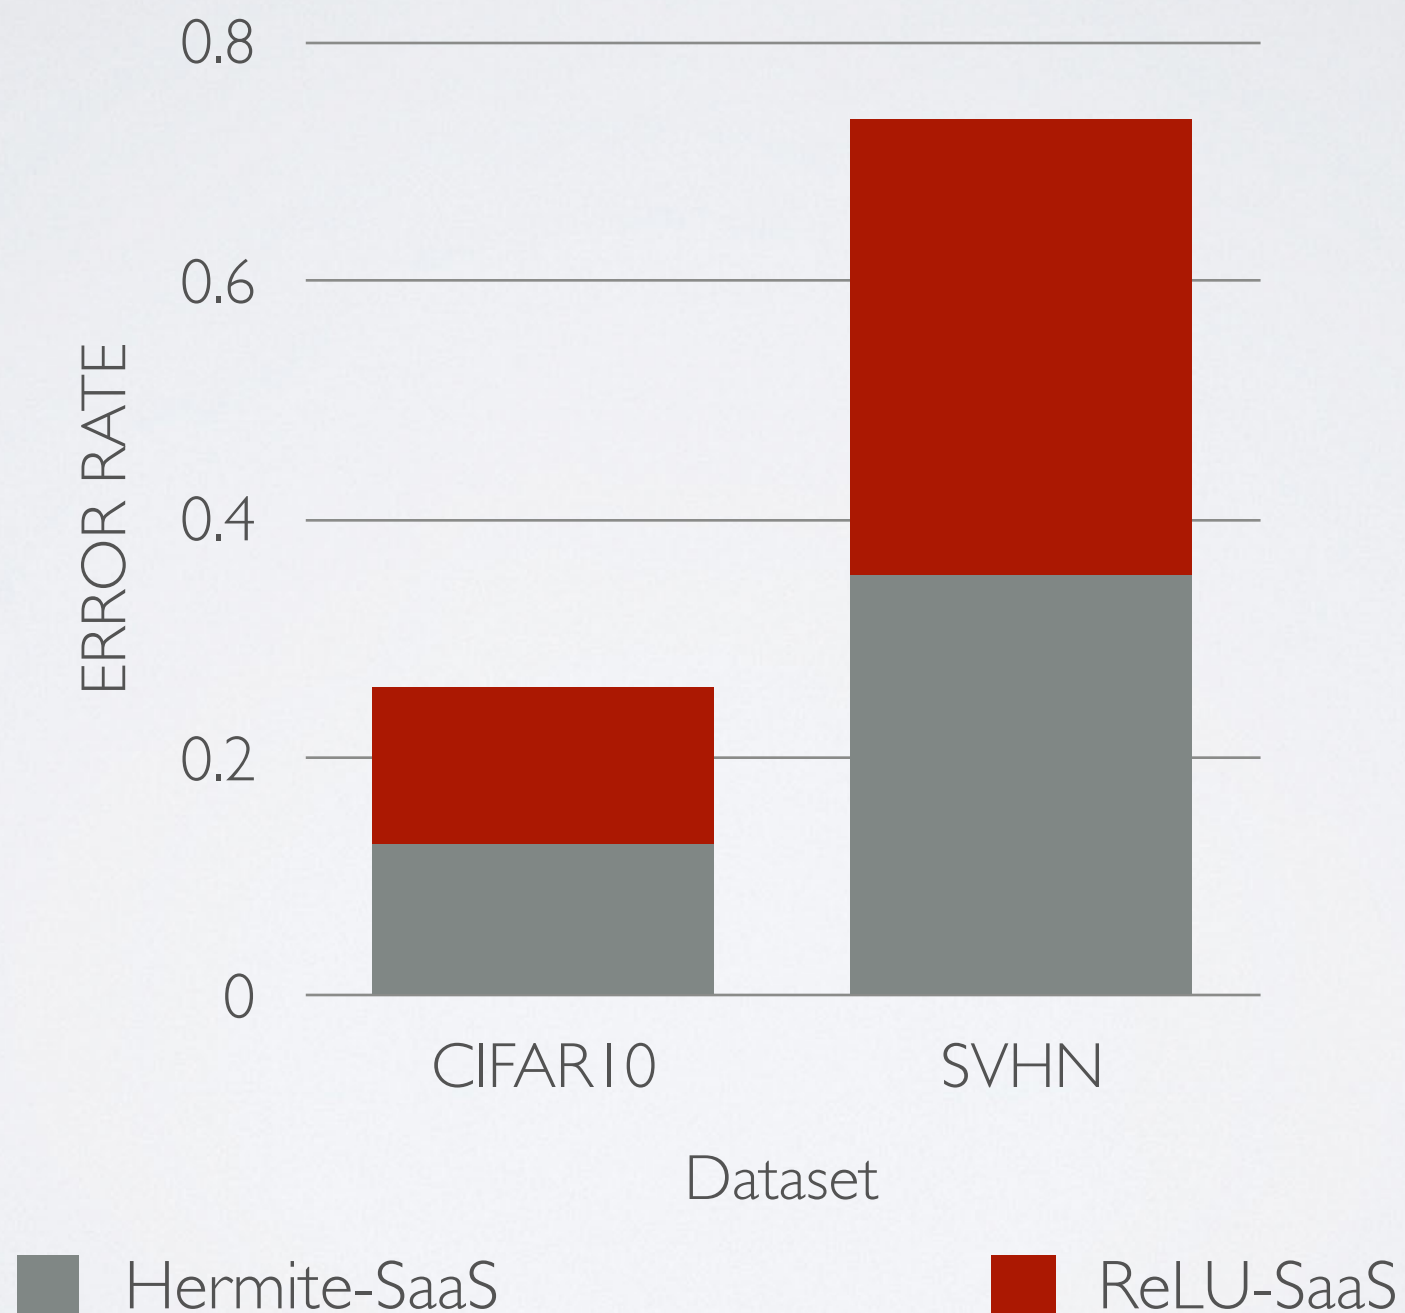



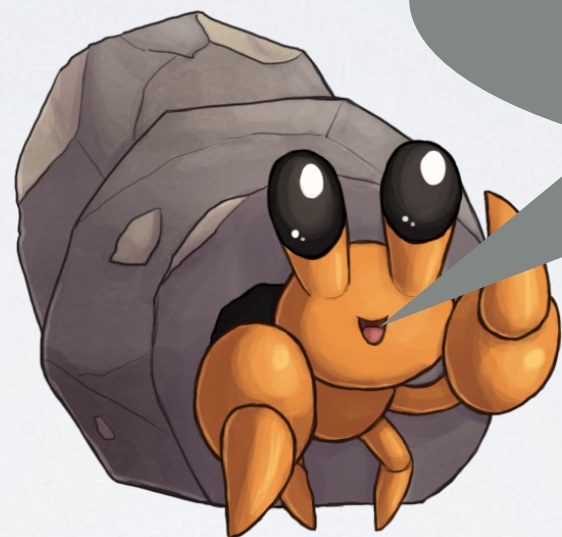

Hermite polynomials  
are nice
