# Supplementary material
Source: ML conference proceedings conference paper supplement (https://openaccess.thecvf.com/content/CVPR_2020/html/Lokhande_Generating_Accurate_Pseudo-Labels_CVPR_2020_paper.html)
Supplement: Supplementary file 5 [file Lokhande_Generating_Accurate_Pseudo-Labels_CVPR_2020_supplemental.zip]

Archive with 4 entries (4 files):
- supplementary-MAIN.pdf
- __MACOSX/._supplementary-MAIN.pdf
- supplementary-SLIDES.pdf
- __MACOSX/._supplementary-SLIDES.pdf
